# Supplementary material for: Phylogeny and evolution of plant macrophage migration inhibitory factor/D-dopachrome tautomerase-like proteins
Source: PubMed Central journal article supplement (PMC4407349; doi:10.1186/s12862-015-0337-x), 2015-04-14

# Supplemental Figure 2A

*AtMDL1*

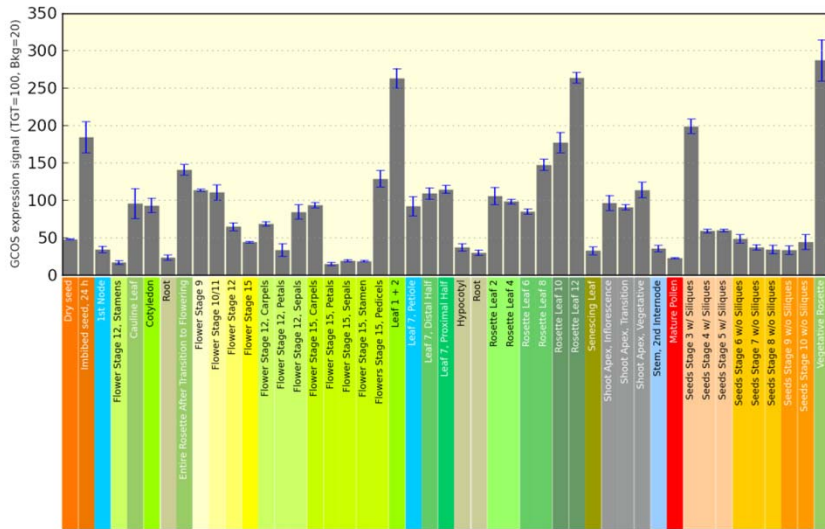

*AtMDL2*

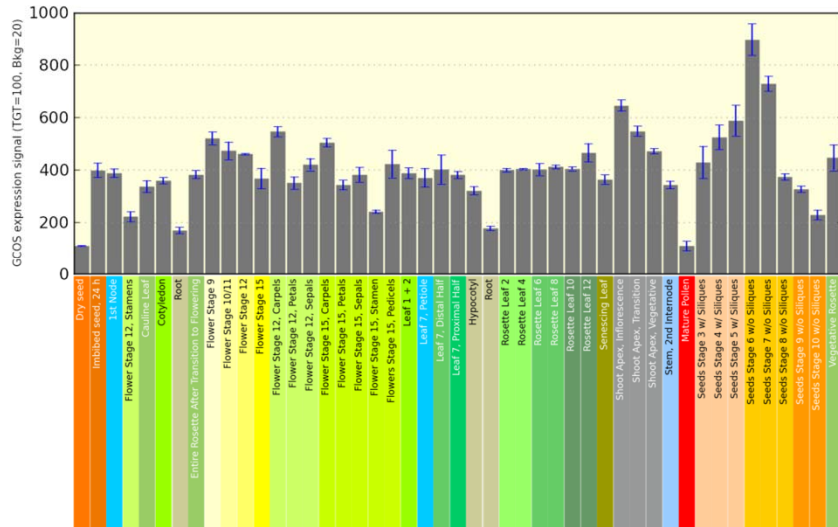

*AtMDL3*

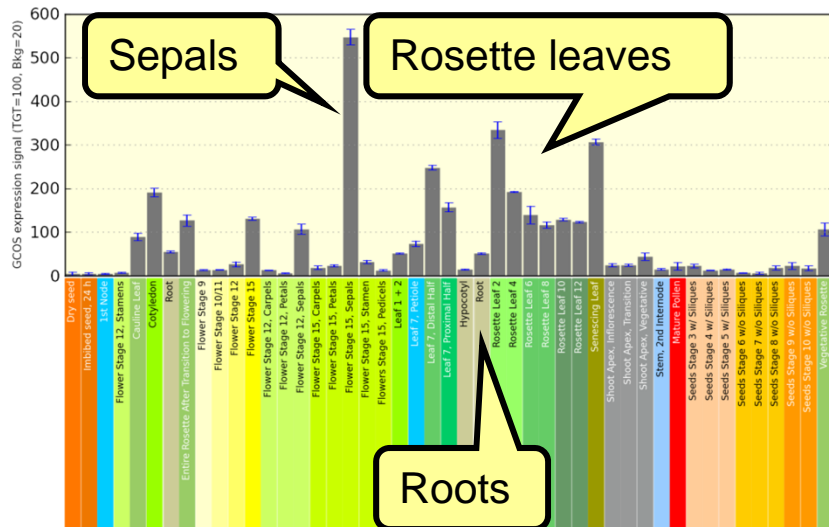

# Supplemental Figure 2B

## Abiotic Stress

## Abiotic Stress II

*AtMDL1*

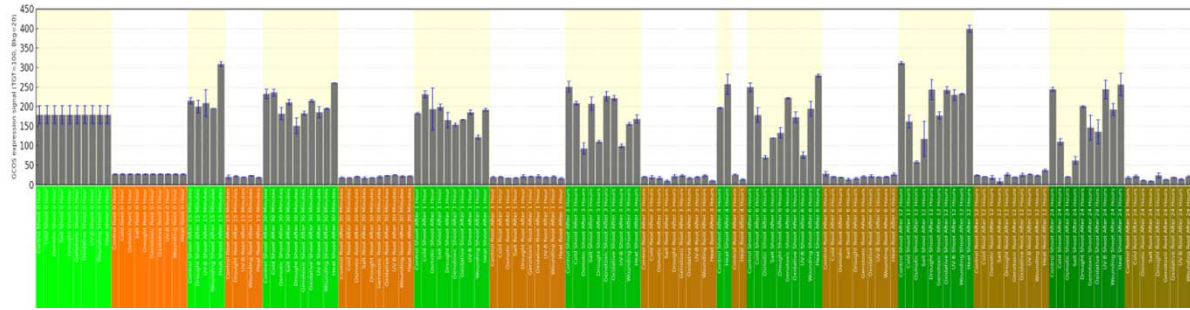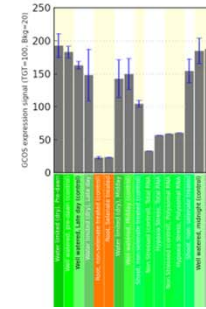

*AtMDL2*

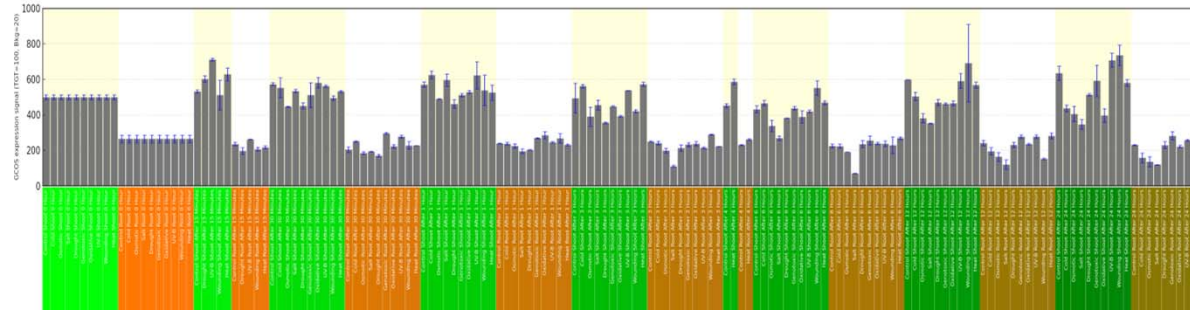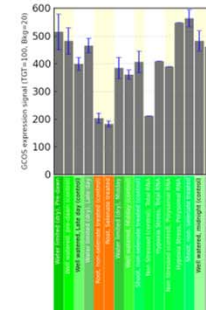

*AtMDL3*

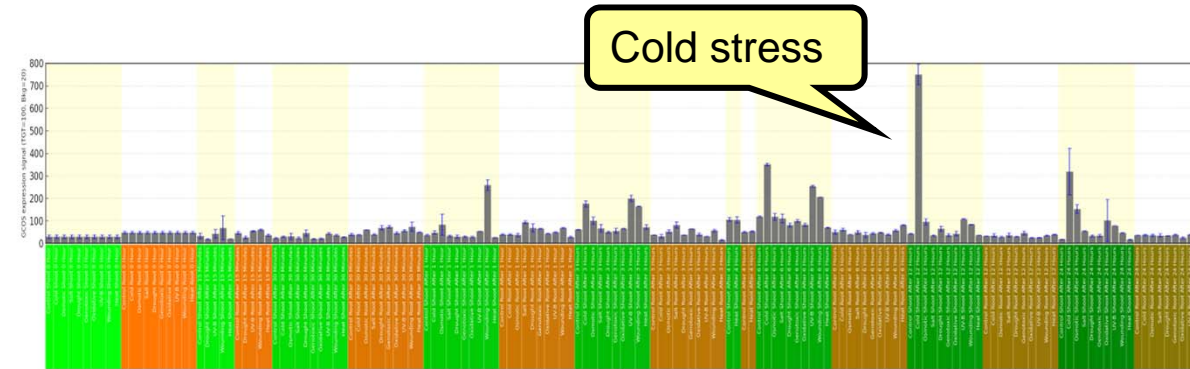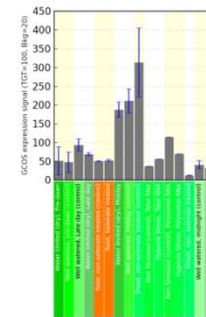

# Supplemental Figure 2C

## Biotic Stress

## Biotic Stress II

*AtMDL1*

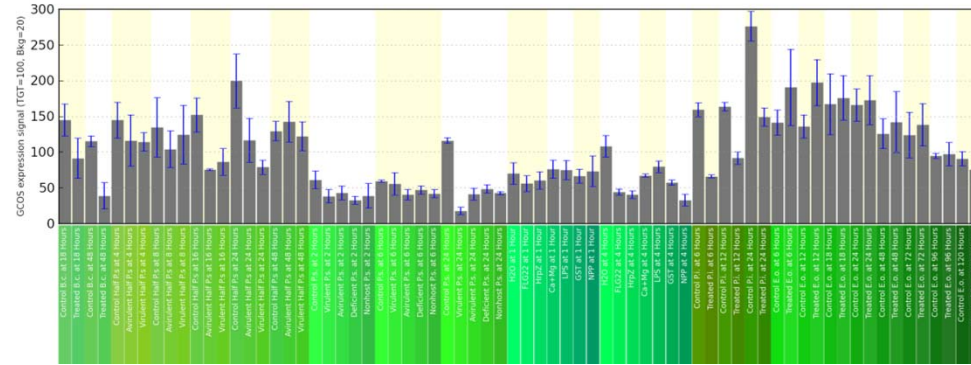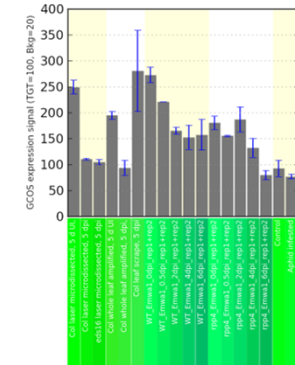

*AtMDL2*

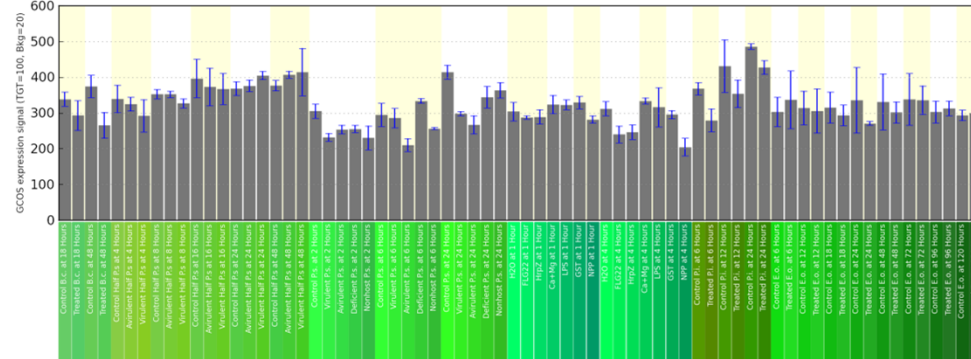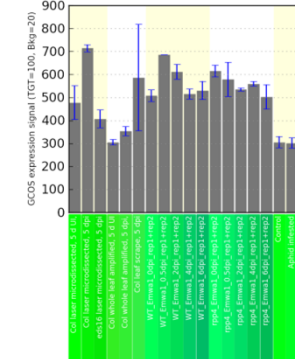

*AtMDL3*

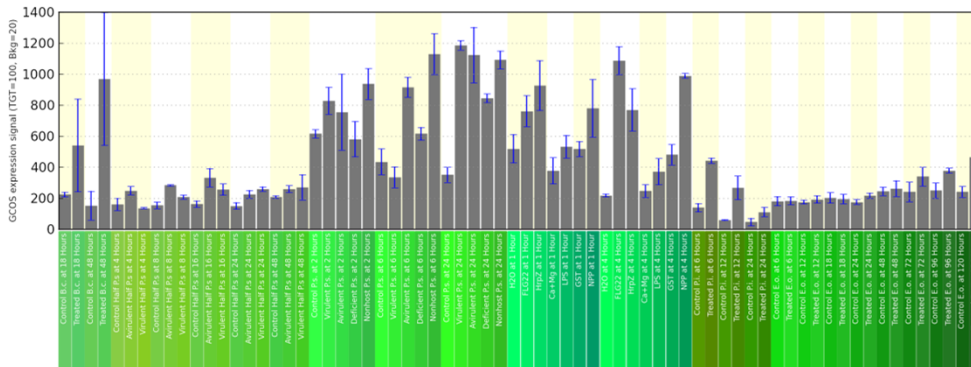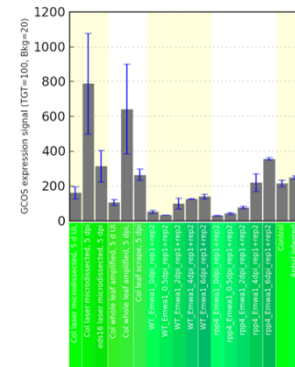

Supplement: 12862_2015_337_MOESM2_ESM.pdf [file 12862_2015_337_MOESM2_ESM.pdf]
