# Supplementary material for: Phylogeny and evolution of plant macrophage migration inhibitory factor/D-dopachrome tautomerase-like proteins
Source: PubMed Central journal article supplement (PMC4407349; doi:10.1186/s12862-015-0337-x), 2015-04-14

Supplemental Figure 1

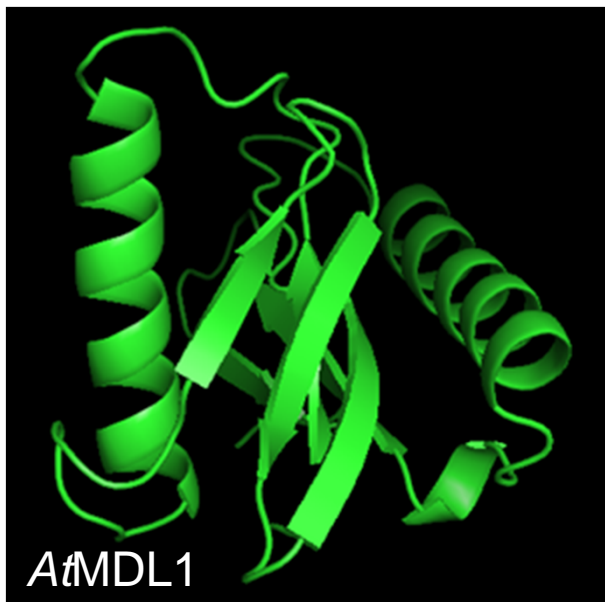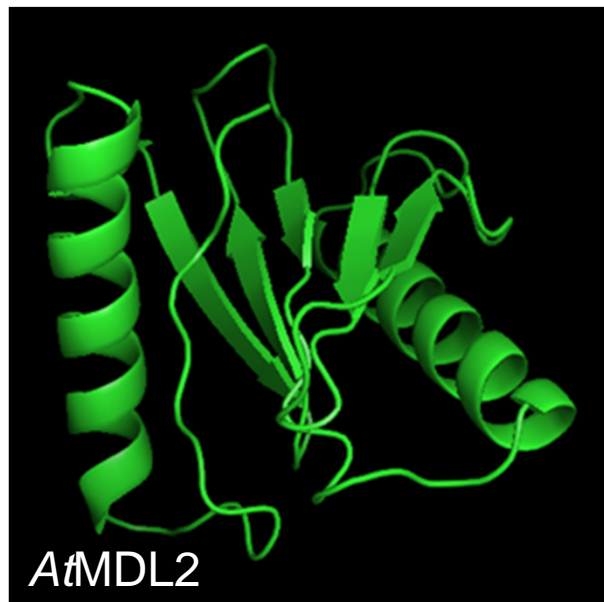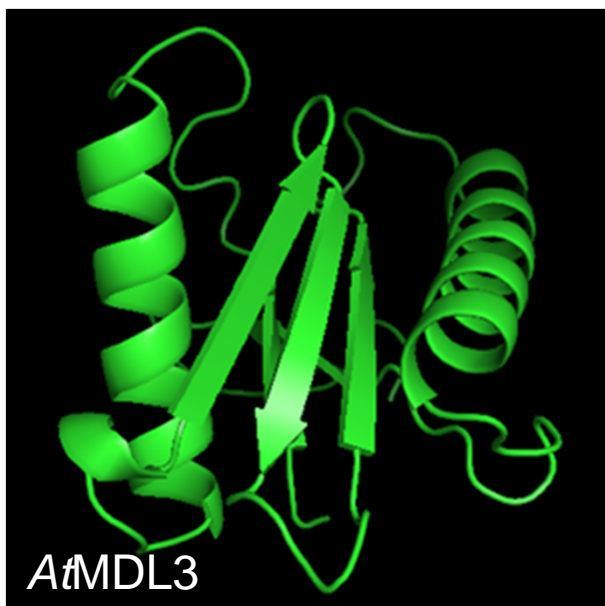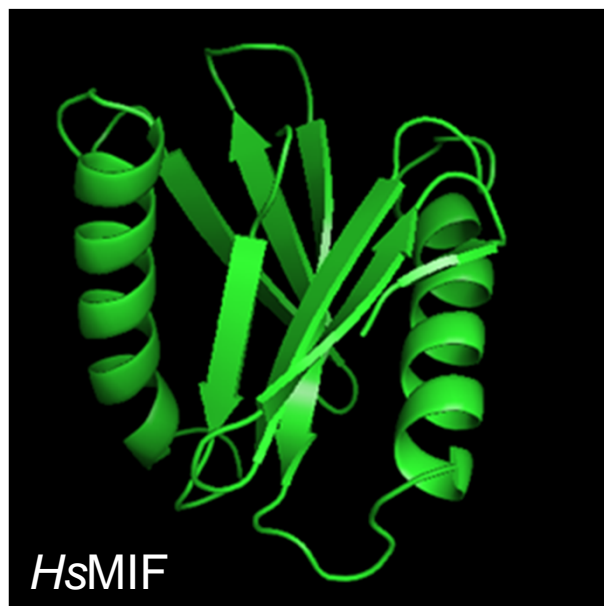

Supplement: 12862_2015_337_MOESM1_ESM.pdf [file 12862_2015_337_MOESM1_ESM.pdf]
