# Supplementary material for: Phylogeny and evolution of plant macrophage migration inhibitory factor/D-dopachrome tautomerase-like proteins
Source: BMC Evol Biol. 2015 Apr 14;15:64. doi: 10.1186/s12862-015-0337-x (PMC4407349; doi:10.1186/s12862-015-0337-x)
Supplement: Additional file 5: Figure S3. — Multiple sequence alignment of plant MDL proteins. Plant MDL amino acid sequences were aligned with ClustalW2 (http://www.ebi.ac.uk/Tools/msa/clustalw2/) using standard parameters. Subsequently, the alignment was shaded with BoxShade 3.21 (http://www.ch.embnet.org/software/BOX_form.html) using standard settings. A black shade indicates identical amino acids; a grey shade denotes similar amino acids. In the consensus line, asterisks specify invariant amino acids and dots conserved amino acids with similar biophysical properties at a given position. [file 12862_2015_337_MOESM5_ESM.pdf]

**Supplemental Figure 3. Multiple sequence alignment of plant MDL proteins.**

1 *S. vulgare\_BAJ88384* M P Q L S N S T N V P - I D V V A A I L R C K A V A I I G K P E S V M V M L G S V P S F G - G T E E P A A Y G E L V S I G G L G P G V N - G K L S A A I A D L E T K L S V P K  
 1 *B. distachyon\_XP\_003577817* M P Q L S N S T N V P - I D V V A A I L R C K A V A I I G K P E S V M V M L G S V P S F G - G T E E P A A Y G E L V S I G G L G P G V N - G K L S A A I A D L E T K L S V P K  
 1 *O. sativa\_NP\_001058472* M P Q L S N S T N V P - I D V V A A I L R C K A V A I I G K P E S V M V M S S S V P S F - G T E E P A A Y C E L V S I G G L G P G V N - G K L S A A A B E L E T K L S V P K  
 1 *S. bicolor\_XP\_002438947* M P L T L N S T N V P - I D V V A A I L R C K A V A I I G K P E S V M V M S N G S V P S F - G T E E P A A Y G E L V S I G G L G P G V N - G K L S A A A E L E T K L S V P K  
 1 *Z. mays\_NP\_001150913* M P L T L N S T N V P - I D V V A A I L R C K A V A I I G K P E S V M V M S N G S V P S F - G T E E P A A Y G E L V S I G G L G P G V N - G K L S A A A E L E T K L S V P K  
 1 *S. lycopersicum\_XP\_004242799* M P L T L N F T N V P - I D V V A I S I L K D A K A V A I I G K P E S V M V M L N G S V P A F - G T E E P A A Y G E L V S I G G L G P G V N - G K L S T I A B L E T K L S V P K  
 1 *A. thaliana\_AtMDL1* M P L T L N F T N V P - I D V V T C S I L K D A K A V A I I G K P E S V M V M L N G S V P A F - G T E E P A A Y G E L V S I G G L G P G V N - G K L S T I A B L E T K L S V P K  
 1 *P. persica\_XP\_007225890* M P L T L N F T N V P - I D V V A S I L K D A K A V S I I G K P E S V M V M L N G S V P A F - G T E E P A A Y G E L V S I G G L G P G V N - G K L S T I A B L E T K L S V P K  
 1 *G. max\_NP\_001238163* M P L T D F T N V P - I D V V A S I L R D A K A V A I I G K P E S V M V M L N G S V P A F - G T E E P A A Y G E L V S I G G L G P G V N - G K L S T I A B L E T K L Y I D G  
 1 *L. japonicus\_AFK37854* M P L T L N F T N V P - I D V V A S I L R D A K A V A I I G K P E S V M V M L N G S V P A F G - G T E E P A A Y G E L V S I G G L G P G V N - G K L S T I A B L E T K L Y I D G  
 1 *V. vinifera\_XP\_002264373* M P L T L N F T N V P - I D V V A S I L R D A K A V A I I G K P E S V M V M L N G S V P A F - G T E E P A A Y C E L V S I G G L G P G V N - G K L S T I A B L E T K L S V P K  
 1 *P. sitchensis\_ABK23267* M P L T L N S T N V P - I D S V A S I L R D A K S V A I I G K P E S V M V M L K G S V P A F G - G T E E P A A Y G E V S I G G L G P G V N - G K L S A A I A D L E T K L S V P K  
 1 *S. moellendorffii\_XP\_002961952* M P L T L N S T N V P - A K S V A S I L K D A K A V S I I G K P E Q V M V M L K G S V P S F G - G T E E P A A Y G E V S I G G L G P G V N - G L S A A I A S L E T K L S V P P  
 1 *C. reinhardtii\_XP\_001691775* M P L T L N I N V A - G R V T V S I L K A L K A V A S S V K P E Q V M V A S T T D K E I G - G T E E P C A G Y F I S I G G L G G K N - G L S A A I C E L E T A K I G V P A  
 1 *V. carteri\_XP\_002955179* M P L T L N I N V P - C R V T V S I L K A L K A V S S V K P E Q V M C S S T T D K E I G - G T E E P C A G Y F I S I G G L G G V N P N I - G L S A A I C E L E T H I G V P A  
 1 *P. patens\_XP\_001768921* M P L T L N S T N V P - L D G V T S I L K D A K A V A O I K S P E S V I S L G G I P S F G - G T E E P A A Y G E L V S I G G L G P G V N - G L S A A I A S L E T K L S V P K  
 1 *S. moellendorffii\_XP\_002966661* M P L T L N S T N V P - L D G V T S I L K D A S T V A V I G K P E S V M V M L N A V E S F G - G T E E P A A Y G E L V S I G L S P S N - G K L S A A I A S L E T K L V P P  
 1 *S. moellendorffii\_XP\_002964007* M P I I T I S T N T S - I D S T F Y L L O A A A V A V I G K P E S S V M L N D R V L F G - G R E A A Y G E L V S I G L S P S N - G L S A A I A S L E T K L S V P P  
 1 *S. moellendorffii\_XP\_002983015* M P V I T I S T N V L D G S L M S S I K L H E V A T T C K P E S V M V M L L G S V P A F G - G T E E P A A Y C E L V S I G G L G P G V N - Q D I C H A T A R L E E B E V P P  
 1 *S. lycopersicum\_XP\_004249062* M P Q L N S T N V N - L G V D T S I L S A I S T V A I I G K P E A V M V M L K G S V P A F G - G T E E P A A Y G E L V S I G G L A V N - G K L S A A I A D L E T K L S V P K  
 1 *A. thaliana\_AtMDL2* M P Q L N S T N V N - L D G V D T S I L S A I S T V A I I G K P E N V M V M L K G S V P S F G - G T E E P A A Y G E L V S I G G L A V N - G K L S A A I S A L E T K L S V P K  
 1 *G. max\_NP\_001236304* M P Q L N S T N V S - L G V D T S I L A I S S V A S I I G K P E A V M V M L K G S V P A F G - G T E E P A A Y G E L V S I G G L A V N - G K L S A A I A S L E T K L S V P K  
 1 *V. vinifera\_XP\_002263560* M P Q L N S T N V S - L D G V D T S I L S A I S T V A I I G K P E A V M V M L K G S V P A F G - G T E E P A A Y G E L V S I G G L N G T N - G L S A A I S A L E T K L S V P K  
 1 *P. persica\_XP\_007202497* M P Q L N S A N V S - L G V D T S I L S A I S T V A I I G K P E A V M V M L K G S V P A F G - G T E E P A A Y G E L V S I G G L A V N - G K L S A A I A S L E T K L S V P K  
 1 *G. max\_NP\_001237629* M P Q L N S T N V N - L D G V D T S I L S A I S T V A S I I G K P E A V M V M L K G S V P S H G - G T E E P A A Y G E L V S I G G L S P S N - G K L S A A I S A L E T K L S V P K  
 1 *L. japonicus\_AFK37368* M P Q L N S T N V N - L D G V D T S I L S A I S T V A T I I G K P E A V M V M L K G S V P S F G - G T E E P A A Y G E L V S I G G L A V N - G K L S A A I A S L E T K L S V P K  
 1 *H. vulgare\_BAJ92045* M P Q L N S T N V N - L G V D T S A L A D A S T V A I I G K P E A V M V M L K G S V P A F G - G T E E P A A Y C E L V S I G G L A V N - G K L S A A I S A L E T K L S V P K  
 1 *B. distachyon\_XP\_003579042* M P Q L N S T N V N - L D G V D T S A L A D A S T V A I I G K P E A V M V M L K G S V P A F G - G T E E P A A Y G E L V S I G G L S P V N - G K L S A A I A S L E T K L S V P K  
 1 *O. sativa\_ABG22330* M P Q L N S T N V N - L D G V D T S A L A D A S T V A I I G K P E A V M V M L K G S V P A F G - G T E E P A A Y G E L V S I G G L A V N - G K L S A A I A S L E T K L S V P K  
 1 *S. bicolor\_XP\_002441679* M P Q L N S T N V N - L G V D T S I L A I A K S V A N I I G K P E A V M V M L K G S V P A F G - G T E E P A A Y G E L V S I G G L A V N - G K L S A A I S A L E T K L S V P K  
 1 *Z. mays\_XP\_008677331* M P Q L N S T N V N - L G V D T S I L A I A K S V A N I I G K P E A V M V M L K G S V P A F G - G T E E P A A Y G E L V S I G G L A V N - G K L S A A I S A L E T K L S V P K  
 1 *P. sitchensis\_ABK23881* M P S L N S T N V P - L G I C T S I L S I T S K V A I I G K P E A V M V M L K G S V A S F G - G T E E P A A Y G E L V S I G G L S T N - G K L S A A I A T I K I K V P K  
 1 *S. lycopersicum\_XP\_004249685* M P C F N S T N V N - L D G V D T S F F S A I K A V S S I I G K P E N V M V M L K G S V P S F G - G T E E P A A Y E V S I G G L S V K - E L I A T A G C O N F S P K  
 1 *V. vinifera\_XP\_002264120* M P Q D I S T N V N - L G V A D P F S F V A K A V S S I I G K P E N V M V M L K G S V A S F E - G T E E P A A Y E V S I G G L S V K - E L I A T A G C I T K L S P K  
 1 *G. max\_ACU19241* M P Q C Y I T N N - L D G V D I N P F S A I A V S T I I G K P E K V M V M L K G S V P S F E - G T E E P A A Y E V S I G G L S T V K - E L I A T A T I L O N L S P K  
 1 *L. thaliana\_AFK35159* M P Q C Y I T N N - L D G V D I D F S A I A V S T I I G K P E K V M V M L K G S V P S F E - G T E E P A A Y E V S I G G L S V K - E L I A T A T I L O N L S P K  
 1 *A. thaliana\_AtMDL3* M P Q C Y I T N V N - F D G V N D P P S V A K A V S I I G K P E N V M V M L K G S V A S V F G

B\_vulgaris\_BAJ88384 94 SRFYKFFDDYQYNNVNGNTH  
B\_distachyon\_XP\_003577817 94 SRFYKFFDDYQYNNLNGSTG  
O\_sativa\_NP\_001058472 94 SRFYKFFDDYGFNLNGSTG  
S\_bicolor\_XP\_002438947 94 SRFYKFFDDYQSFNFGNGST  
Z\_mays\_NP\_001150913 94 SRFYKFFDDYGFHNGFGST  
S\_lycopersicum\_XP\_004242799 94 DRFYKFFDYSPRPFNGST  
A\_thaliana\_AtMDL1 94 SRFYKFFDYSPRPFNGST  
P\_persica\_XP\_007225890 94 SRFYKFFDYERPFNGST  
G\_max\_NP\_001238163 94 SRFYKFFDYQSFNGST  
L\_japonicus\_AFK37854 94 SRFYKFFDYQSFNGST  
V\_vinifera\_XP\_002264373 94 ARFYKFFDYERSFGNGST  
P\_sitchensis\_ABK23267 94 SRFYKFFDYEGYFGST  
S.moellendorffii\_XP\_002961952 94 SRFYKFFDYQSFNGST  
C.reinhardtii\_XP\_001691775 94 NRWYQESDASDVGST  
V\_carteri\_XP\_002955179 98 ARWYQESDASDVGST  
P.patens\_XP\_001768921 94 NRFYKFFDYSDMGNGST  
S.moellendorffii\_XP\_002966661 94 NRFYKFFDYGSNGST  
S.moellendorffii\_XP\_002964007 94 SRFYKFFDYGSNGST  
S.moellendorffii\_XP\_002983015 94 SRFYKFFDYQACVLRWGSVSLFLDEILSF  
S\_lycopersicum\_XP\_004249062 94 SRFYKFFDYGSFGNGST  
A\_thaliana\_AtMDL2 94 SRFYKFFDYGSFGNGST  
G\_max\_NP\_001236304 94 SRFYKFFDYGSFGNGST  
V\_vinifera\_XP\_002263560 94 SRFYKFFDYGSFGNGST  
P\_persica\_XP\_007207497 94 SRFYKFFDYGSFGNGST  
G\_max\_NP\_001237629 94 SRFYKFFDYGSFGNGST  
L\_japonicus\_AFK37368 94 SRFYKFFDYGSFGNGST  
H\_vulgaris\_BAJ92045 94 SRFYKFFDYSDFNGST  
B\_distachyon\_XP\_003579042 94 SRFYKFFDYSDFNGST  
O\_sativa\_ABG22330 94 GRFYKFFDYSDFNGST  
S\_bicolor\_XP\_002441679 94 SRFYKFFDYSDFNGST  
Z\_mays\_XP\_008677331 94 SRFYKFFDYSDFNGST  
P\_sitchensis\_ABK23881 94 SRFYKFFDYSDFGNGST  
S\_lycopersicum\_XP\_004249685 94 SRFYKFFDYDT-MTKSKL  
V\_vinifera\_XP\_002264120 94 TRFYKFFDYDT-MHKIAKL  
G\_max\_ACU19241 94 TRFYKFFDYDT-AFTNSKM  
L\_japonicus\_AFK35159 94 TRFYKFFDYDT-LFNSKSL  
A\_thaliana\_AtMDL3 94 TRFYKFFDYDT-SLPDSKL  
P\_persica\_XP\_007207503 95 TRFYKFFDYDT-TGTG-SKL  
consensus 101 \*.  
101
