# Supplementary material for: Phylogeny and evolution of plant macrophage migration inhibitory factor/D-dopachrome tautomerase-like proteins
Source: BMC Evol Biol. 2015 Apr 14;15:64. doi: 10.1186/s12862-015-0337-x (PMC4407349; doi:10.1186/s12862-015-0337-x)
Supplement: Additional file 8: Figure S5. — Multiple sequence alignments of AtMDL1-, AtMDL2- and AtMDL3-like proteins. Plant MDL amino acid sequences were aligned with ClustalW2 (http://www.ebi.ac.uk/Tools/msa/clustalw2/) using standard parameters. Subsequently, the alignment was shaded with BoxShade 3.21 (http://www.ch.embnet.org/software/BOX_form.html) using standard settings. A black shade indicates identical amino acids; a grey shade denotes similar amino acids. In the consensus line, asterisks specify invariant amino acids and dots conserved amino acids with similar biophysical properties at a given position. [file 12862_2015_337_MOESM8_ESM.pdf]

S. *lycopersicum*\_XP004249685 60 EAETVSMGGINSVVKRKLIATIGTILQNLSPTRRFFFLKVYDITMATKFSKL  
V. *vinifera*\_XP002264120 60 EAETVSMGGINSVVKRKLIATIGTILQNLSPTRRFFFLKVYDITMATKIAKL  
G. *max*\_ACU19241 60 YAEIVSMGGISTEVVKRKLIATIGTILQNLSPTRRFFFLKVDFVAFATNSKM  
L. *japonicus*\_AFK35159 60 YAEITVSMGGINSVVKKKLIYVIGTILQNLSPTRRFFFLKVFDITITFNKSL  
P. *persica*\_XP007207503 61 YGELVAMGGINKPVKRLIATIGTIVEAKLSIPKTRFFFLKVVDISTATG-SKL  
A. *thaliana*\_AtMDL3 60 YAEIVSMGGITKQVKRKLIATVGSILHGFHSIPKTRRFFFLKVDFINSPLPSKL  
consensus 61 \* \* \* \* \*  
61 \* \* \* \* \*
